# Supplementary material for: A highly specific aptamer for the SARS-CoV-2 spike protein from the authentic strain
Source: Royal Society of Chemistry journal article supplement (doi:10.1039/d4ob00645c), 2024-01-01
Supplement: d4ob00645c1.pdf [file d4ob00645c1.pdf]

## Supplementary information for

### Highly specific aptamer for SARS-CoV-2 spike protein from the authentic strain

Maria G. Khrenova <sup>a,b\*‡</sup>, Lyudmila Nikiforova <sup>a‡</sup>, Fedor Grabovenko <sup>a</sup>, Nadezhda Orlova <sup>c</sup>,  
Maria Sinegubova <sup>a</sup>, Denis Kolesov <sup>c</sup>, Elena Zavyalova <sup>a</sup>, Maksim F. Subach <sup>a</sup>, Igor V.  
Polyakov <sup>a</sup>, Timofei Zatzepin <sup>a</sup>, Maria Zvereva <sup>a</sup>

<sup>a</sup> Chemistry Department, Lomonosov Moscow State University, 119991 Moscow, Russia.

<sup>b</sup> Bach Institute of Biochemistry, Federal Research Centre "Fundamentals of Biotechnology" of the Russian Academy of Sciences, Moscow 119071, Russia.

<sup>c</sup> Laboratory of Mammalian Cell Bioengineering, Institute of Bioengineering, Federal Research Centre "Fundamentals of Biotechnology" of the Russian Academy of Sciences, Moscow 117312, Russia.

\* Corresponding author. E-mail khrenovamg@my.msu.ru

‡ These authors contributed equally to this work

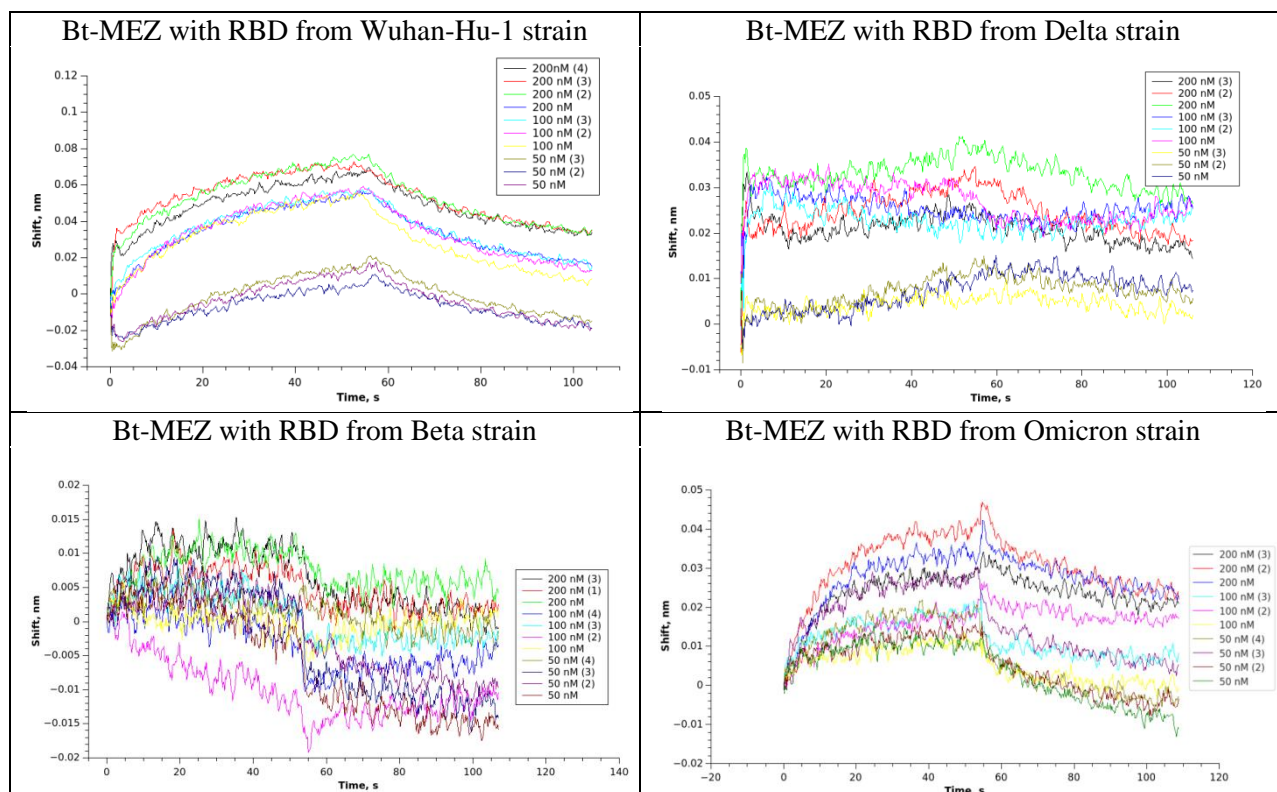

**Figure S1.** BLI sensorgrams for complexes of Bt-MEZ with RBD variants with mutations in the SARS-CoV-2 Spike proteins considered in the study.

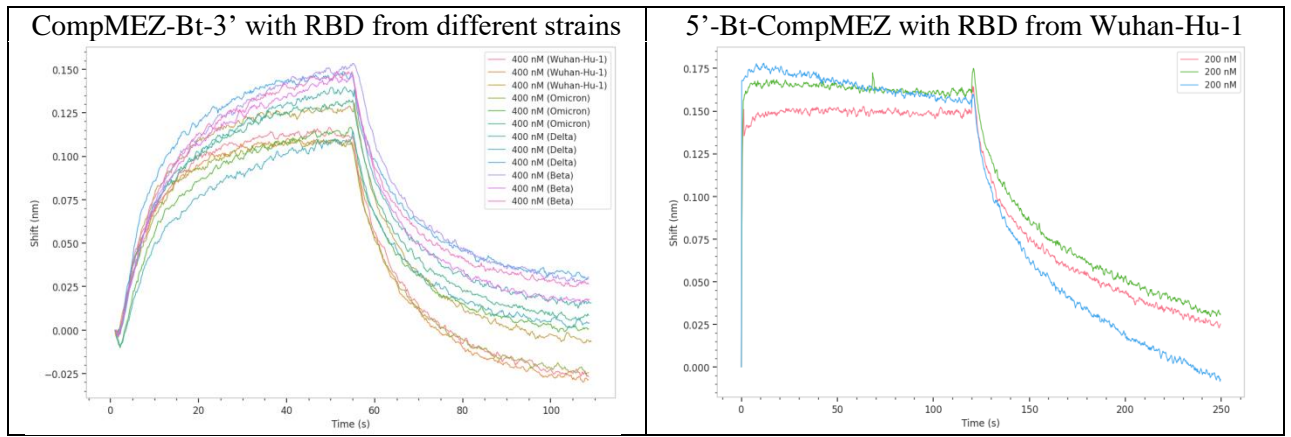

**Figure S2.** BLI sensorgrams for complexes of 5'- and 3'-biotinylated complementary MEZ with RBD variants with mutations in the SARS-CoV-2 Spike proteins considered in the study.

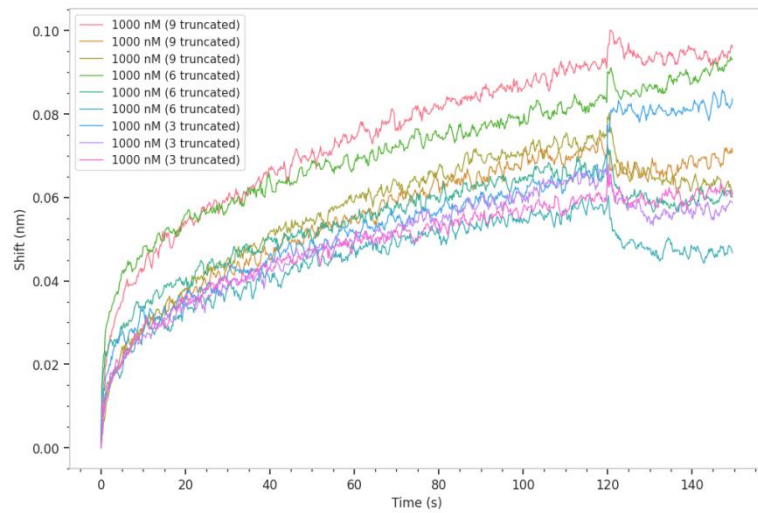

**Figure S3.** BLI sensorgrams for complexes of 5'-truncated MEZ with RBD from Wuhan-Hu-1 strain.
